1 **Consequences of single-locus and tightly linked genomic**  
2 **architectures for evolutionary responses to environmental change**

3

4

5 Rebekah A. Oomen<sup>1,2\*</sup>  
6 rebekahoomen@gmail.com

7

8 Anna Kuparinen<sup>3</sup>  
9 anna.k.kuparinen@jyu.fi

10

11 Jeffrey A. Hutchings<sup>2,4,5</sup>  
12 jeff.hutchings@dal.ca

13

14 <sup>1</sup> Centre for Ecological and Evolutionary Synthesis, University of Oslo, Oslo, Norway

15 <sup>2</sup> Centre for Coastal Research, University of Agder, Kristiansand, Norway

16 <sup>3</sup> Department of Biological and Environmental Sciences, University of Jyväskylä,  
17 Jyväskylä, Finland

18 <sup>4</sup> Department of Biology, Dalhousie University, Halifax, NS, Canada

19 <sup>5</sup> Institute of Marine Research, Flødevigen Marine Research Station, His, Norway

20

21 \*Corresponding author

22

23 **Running title:** Genomic architecture shapes evolutionary responses

24 **Abstract**

25

26 Genetic and genomic architectures of traits under selection are key factors influencing  
27 evolutionary responses. Yet, knowledge of their impacts has been limited by a  
28 widespread assumption that most traits are controlled by unlinked polygenic  
29 architectures. Recent advances in genome sequencing and eco-evolutionary modelling are  
30 unlocking the potential for integrating genomic information into predictions of population  
31 responses to environmental change. Using eco-genetic simulations, we demonstrate that  
32 hypothetical single-locus control of a life history trait produces highly variable and  
33 unpredictable harvesting-induced evolution relative to the classically applied multi-locus  
34 model. Single-locus control of complex traits is thought to be uncommon, yet blocks of  
35 linked genes, such as those associated with some types of structural genomic variation,  
36 have emerged as taxonomically widespread phenomena. Inheritance of linked  
37 architectures resembles that of single loci, thus enabling single-locus-like modeling of  
38 polygenic adaptation. Yet, the number of loci, their effect sizes, and the degree of linkage  
39 among them all occur along a continuum. We review how linked architectures are often  
40 associated, directly or indirectly, with traits expected to be under selection from  
41 anthropogenic stressors and are likely to play a large role in adaptation to environmental  
42 disturbance. We suggest using single-locus models to explore evolutionary extremes and  
43 uncertainties when the trait architecture is unknown, refining parameters as genomic  
44 information becomes available, and explicitly incorporating linkage among loci when  
45 possible. We discuss some challenges involved in modelling the evolutionary dynamics  
46 of linked genomic architectures and implementing such knowledge in the conservation  
47 and management of natural populations.

48 **Keywords:** climate change, evolutionary simulation, genetic architecture, linkage  
49 disequilibrium, recombination rate, structural genomic variation

## 50 **Eco-evolutionary responses hinge on genetic and genomic architecture**

51

52 Predicting the responses of populations and species to anthropogenic disturbance is a  
53 major challenge, and one that requires urgent attention given the current climate and  
54 biodiversity crises (IPCC 2018; IPBES 2019). Advances in second- (high throughput)  
55 and third- (long read) generation sequencing have produced a wealth of sequence and  
56 structural genomic data on non-model organisms. These data have great potential to  
57 inform eco-evolutionary models of the responses of natural populations to a variety of  
58 selection pressures (Hoffmann *et al.* 2015; Bay *et al.* 2017a; Coulson *et al.* 2017). Such  
59 models can inform current management strategies and facilitate human societal  
60 adaptation to future environmental conditions and associated ecosystem structures.

61

62 Key parameters influencing evolutionary responses are the genetic and genomic  
63 architectures underlying adaptive traits. Genetic architecture broadly refers to how a trait  
64 is controlled by genes and interactions among alleles (e.g., number and effect sizes of  
65 contributing loci, dominance, epistasis, pleiotropy), while genomic architecture includes  
66 structural arrangement (e.g., inversions, fusions, translocations, duplications), position,  
67 and linkage among loci. Both types of architecture contribute to the inheritance models  
68 for genes underlying adaptive traits that are used in evolutionary predictions.

69

70 Here, we discuss some effects of genetic (the number of loci and their effect sizes) and  
71 genomic (the degree of linkage among loci) architectures on predictions of evolutionary  
72 responses to environmental disturbance. Single or unlinked loci have received  
73 comparatively more attention than linked genomic architectures in this regard (Bay *et al.*  
74 2017a; Kardos & Luikart 2019). We demonstrate that hypothetical single locus control of  
75 a life history trait under harvesting-induced selection generates a more variable  
76 evolutionary response compared to an unlinked polygenic scenario. We then suggest that  
77 linked polygenic architectures resemble those of single large-effect loci, yet exist along a  
78 continuum of linkage disequilibrium, and are likely to play a large role in adaptation to  
79 rapid environmental change. We show that linked architectures underlie diverse traits in  
80 natural populations that are directly or indirectly under environmental selection. Finally,

81 we discuss some barriers to modelling such architectures and challenges they present to  
82 conservation and management. More broadly, we aim to promote the integration of  
83 genomic data into eco-evolutionary modelling of responses to environmental change.

84

85 *Large-effect loci alter evolutionary predictions compared to traditional multi-locus*  
86 *models*

87

88 Considering genetic architecture, the degree to which a trait is controlled primarily by a  
89 single locus or multiple loci will influence its evolution in response to environmental  
90 stressors. Traditional evolutionary models have focused on the fixation dynamics of  
91 single-locus traits suddenly exposed to selection (Orr & Unckless 2014). As single-locus  
92 control of complex traits has been considered rare (Feder & Walser 2005), eco-  
93 evolutionary models of complex non-model organisms often incorporate a standard  
94 inheritance model of 10 or 20 unlinked loci (e.g., Kuparinen & Hutchings 2012). Multi-  
95 locus (e.g., 100+ loci) models based on genomic single nucleotide polymorphism (SNP)  
96 data have also been employed more recently to predict the capacity of a population to  
97 evolve in pace with global climate change (Bay *et al.* 2017a, 2018). Bay *et al.* (2017b)  
98 described a potential framework for genomic predictions of adaptive responses to  
99 environmental change, termed ‘evolutionary response architectures’, but focused on  
100 unlinked polygenic control of climate-associated traits.

101

102 The assumption that single genetic variants accounting for large amounts of phenotypic  
103 variation are rare is being challenged as more refined statistical genomics enable their  
104 discovery (Hoban *et al.* 2016). Large-effect loci have been documented in plants  
105 (Kivimäki *et al.* 2007; Baxter *et al.* 2010), mammals (Johnston *et al.* 2013; Kardos *et al.*  
106 2015; Jones *et al.* 2018; Barrett *et al.* 2019), birds (Toews *et al.* 2019; Merritt *et al.*  
107 2020), and fishes (Colosimo *et al.* 2004; Lampert *et al.* 2010; Barson *et al.* 2015;  
108 Thompson *et al.* 2019). The implications of these variants for eco-evolutionary model  
109 predictions can be severe. For example, after the discovery that the *vgl3* gene is  
110 responsible for 40% of the variation in age at maturity in Atlantic salmon (*Salmo salar*)  
111 (Barson *et al.* 2015), Kuparinen and Hutchings (2017) demonstrated that hypothetical

112 single-locus control of this key, sexually dimorphic life-history trait generates divergent  
113 and disruptive fisheries-induced evolution relative to that predicted by the classically  
114 applied, commonly assumed multi-locus model.

115

116 *Single-locus architecture generates divergent evolutionary responses to harvesting*

117

118 We revisited this model to compare hypothetical single- and multi-locus architectures,  
119 but without dimorphic trait expression, to assess whether genetic architecture affected  
120 trait evolution in a more general scenario absent of sexual dimorphism. To this end, we  
121 took simple averages of the sex-specific probabilities for the male and female age at  
122 maturity. By doing this, a male and a female carrying the same single-locus genotype  
123 have the same probabilities to mature at the ages of 1SW, 2SW and 3 SW. We simulated  
124 10 independent evolutionary trajectories for both the single-locus and the multi-locus  
125 control scenarios and tracked the average age at maturity for each simulation time step.  
126 The simulations involved three phases: i) pristine conditions in the absence of fishing  
127 (500 years, the first 400 of which were discarded as burn-in), ii) exposure to selective  
128 fishing mortality at the rate of 0.2, and iii) recovery in the absence of fishing. The  
129 detailed model description and parameter values are reported in Kuparinen & Hutchings  
130 (2017).

131

132 Despite dimorphism being absent, the simulations demonstrate that single-locus control  
133 of age at maturity generates increased variability in this trait compared to the multi-locus  
134 scenario and that the response to, and recovery from, fishing are also highly varied  
135 (Figure 1). In the single locus scenario, oscillations driven by chaotic dynamics are  
136 evident under pristine conditions, reduced at varying rates under fishing pressure, and  
137 markedly return in only three out of ten simulations (Figure 1a,c). In contrast, the multi-  
138 locus scenario does not generate chaotic dynamics and exhibits little variability both  
139 within and between simulations (Figure 1b,d). Therefore, single locus control of age at  
140 maturity with and without sexually dimorphic expression results in highly unpredictable  
141 evolutionary and ecological responses to fishing-induced selection on this trait, relative to  
142 the commonly assumed multi-locus control.

143

144 This result is consistent with recent simulations demonstrating increased variability in  
145 population viability under rapid directional environmental change when the trait under  
146 selection is under single-locus rather than multi-locus control (Kardos & Luikart 2019). It  
147 further suggests that recovery following relaxation of selection is also highly variable.

148

149 *Inheritance of linked polygenic architectures resembles that of single loci*

150

151 Particularly for complex traits, such as those contributing to growth, behaviour, or  
152 environmental responses, polygenic control might indeed be the norm (Savolainen *et al.*  
153 2013; Palumbi *et al.* 2014; Bay *et al.* 2017a). Yet, considering genomic architecture,  
154 blocks of tightly linked putatively adaptive genes that undergo reduced or no  
155 recombination are taxonomically widespread (Nosil *et al.* 2009; Rogers *et al.* 2011;  
156 Yeaman 2013; Wellenreuther & Bernatchez 2018).

157

158 There are several mechanisms by which linked clusters might evolve in response to  
159 selection, but all are characterized by a reduction in recombination (Yeaman 2013). This  
160 is because when linkage captures an advantageous allelic combination, selection will  
161 favour a reduced recombination rate in that region to avoid splitting up complementary  
162 alleles (Charlesworth & Charlesworth 1979; Kirkpatrick & Barton 2006; Bürger &  
163 Akerman 2011; Yeaman & Whitlock 2011). Low recombination rates can be achieved by  
164 genic modifiers that decrease the frequency of crossovers during meiosis or genomic  
165 rearrangements that alter gene order, suppress recombination, and/or generate unbalanced  
166 gametes in heterozygotes (Figure 2; Butlin 2005; Ortiz-Barrientos *et al.* 2016).

167 Recombination rate is also negatively correlated with epistasis, chromosome length, and  
168 proximity among loci (Kong *et al.* 2002; Butlin 2005). Further, sequence content can  
169 have both positive (CpG content) and negative (GC, polyA/polyT, and heterochromatin  
170 content) effects on recombination rate (Kong *et al.* 2002). The lower the rate of  
171 recombination, the more the inheritance pattern of a genomic region containing multiple  
172 loci resembles that of a single locus, such that complete linkage among genes would  
173 result in their co-inheritance (Figure 3).

174

175 *Linked polygenic architectures are ubiquitous and exist along a continuum of linkage*  
176 *disequilibrium*

177

178 Linked regions are often identified in population genomic studies as ‘genomic islands of  
179 divergence’ (regions that exhibit greater differentiation than expected under neutrality;  
180 Wu 2001), although the degree of linkage varies depending on the mechanism of  
181 recombination suppression (Figure 2). For example, genic modifiers might only partially  
182 reduce recombination, leading to low or moderate levels of linkage disequilibrium (LD;  
183 non-random association of alleles at different loci)(Butlin 2005).

184

185 In contrast, extreme cases of tightly linked co-adapted gene complexes associated with  
186 discrete complex phenotypes, known as supergenes, underlie key life-history traits in a  
187 variety of species (Schwander *et al.* 2014). Supergenes are often associated with  
188 structural genomic variation, which underlies complex phenotypes and adaptive  
189 processes in a wide variety of non-model taxa (Mérot *et al.* in review; Wellenreuther *et*  
190 *al.* 2019). There is emerging evidence that structural variants might comprise the most  
191 important source of genetic variation in natural populations, as they have been found to  
192 account for several times more genomic variation than SNPs (e.g., 3x in the Australasian  
193 snapper [*Chrysophrys auratus*; Catanach *et al.* 2019], 12x in *Homo sapiens* [Pang *et al.*  
194 2010]).

195

196 One of the most well studied types of structural variant is the chromosomal inversion  
197 (Sturtevant 1921; Wellenreuther *et al.* 2019). Inversions prevent recombination within the  
198 inverted region by displacing crossovers away from breakpoints during meiosis (at least  
199 in *Diptera* flies) or by producing lethal meiotic products (if the inversion does not include  
200 the centromere) or inviable gametes (if the inversion spans the centromere) in  
201 heterokaryotypes, resulting in the selective recovery of non-recombinant chromosomes  
202 (Reiseberg 2001; Hoffmann & Rieseberg 2008; Wellenreuther & Bernatchez 2018).

203

204 Other types of structural variation, such as chromosomal fusions and fissions,  
205 translocations, and copy number variants (CNVs), can also generate unbalanced gametes  
206 (Rieseberg 2001), which is expected to have similar implications for recombination rate  
207 reduction. Chromosomal fusions reduce recombination to a lesser extent than inversions,  
208 but to varying degrees in both heterozygotes and fused homozygotes (Bidau *et al.* 2001;  
209 Guerrero & Kirkpatrick 2014). There is also at least one example of a complex CNV  
210 maintaining linkage among candidate genes associated with multiple traits, effectively  
211 acting as a supergene (Tigano *et al.* 2018). While the precise mechanisms for reducing  
212 recombination are not yet clear for many types of structural variation, the field is poised  
213 for major advances (Mérot *et al.* in review).

214

215 *Linked architectures play a large role in adaptation to rapid change*

216

217 Linked architectures are hypothesized to facilitate rapid adaptation by enabling  
218 inheritance of co-adapted gene complexes. Instead of accumulating beneficial alleles over  
219 multiple generations, they come as a package that has the potential to spread rapidly  
220 through a population, similar to a single large-effect gene (Kirkpatrick & Barrett 2015).  
221 Therefore, while the extent of recombination in linkage blocks can vary, a linked  
222 genomic architecture would enable single-locus-like modeling of polygenic adaptation.  
223 Their prevalence, especially the rising ubiquity of structural variation, necessitates a  
224 reassessment of common assumptions regarding the degree to which genes contributing  
225 to a polygenic trait are likely to be physically linked and/or experience reduced  
226 recombination. Next, we seek to highlight the broad potential of modelling linked  
227 architectures for the purpose of predicting responses of natural populations to  
228 environmental disturbance.

229

230 **Linked genomic architectures underlie diverse traits in natural populations that are**  
231 **directly or indirectly under environmental selection**

232

233 In recent years, linked genomic architectures have been associated with a variety of  
234 adaptive traits in natural populations (Table 1). While inversions appear to be the most



235 commonly studied (Wellenreuther & Bernatchez 2018; Wellenreuther *et al.* 2019),  
236 chromosomal fusions (Wellband *et al.* 2019) and complex architectures involving  
237 multiple rearrangements (Tigano *et al.* 2018; Pearse *et al.* 2019) are also associated,  
238 directly or indirectly, with traits relevant for adaptation. In some cases, SNPs located in  
239 proximity to one another are found to be in LD and the structural architecture is yet to be  
240 determined (e.g., Micheletti *et al.* 2018). Considering that the cataloguing of structural  
241 genomic variation is still in its infancy and that our understanding of recombination rate  
242 variation is lacking (Mérot *et al.* in review), we adopt an inclusive approach regarding the  
243 examples discussed.

244

245 *Linked architectures are favoured by selection under gene flow*

246

247 Theoretical work has implicated the genetic and genomic architecture of adaptive traits as  
248 the key element in determining whether they will be lost under gene flow (Bürger &  
249 Akerman 2011; Yeaman & Whitlock 2011; Yeaman 2013; Aeschbacher & Bürger 2014;  
250 Akerman & Bürger 2014). Alleles with large effect sizes are less likely to be  
251 overwhelmed by gene flow (Yeaman & Otto 2011), as are tightly linked polygenic  
252 architectures because they effectively act as a single large-effect locus (Griswold 2006;  
253 Yeaman & Otto 2011). Gene flow increases the risk of breaking up co-adapted alleles,  
254 thereby selecting for reduced recombination and increased linkage (Nosil *et al.* 2009;  
255 Tigano & Friesen 2016).

256

257 The evolution of linked architectures under gene flow might explain why they appear to  
258 be common in species with high dispersal capabilities: flying insects, birds, and fishes  
259 (Table 1; Wellenreuther & Bernatchez 2018). Many examples of extremely tight linkage  
260 derive from systems in which closely related species or ecotypes are living in sympatry  
261 (Nosil *et al.* 2009; Hooper 2016). Yet, high gene flow is pervasive in the natural world,  
262 including many plants with high seed dispersal and marine organisms with pelagic early  
263 life stages. Therefore, linked architectures are likely common.

264

265 *Linked architectures are often directly associated with environmental adaptation*

266

267 Linked architectures associated with adaptation to local environmental variables seem  
268 particularly common among flies and fishes (Table 1; Wellenreuther & Bernatchez  
269 2018). Flies in the genus *Drosophila* provide numerous examples of inversions associated  
270 with environmental adaptation, including those exhibiting latitudinal (Krimbas & Powell  
271 1992; Anderson *et al.* 2005; Rane *et al.* 2015; Fuller *et al.* 2016, 2017; Kapun & Fabian  
272 2016; Kapun & Flatt 2019) and altitudinal (Kapun & Flatt 2019) clines, as well as  
273 adaptation to a desert environment (possibly through the host plant; Guillén & Ruiz  
274 2012). Of particular interest from a human health perspective, environmentally structured  
275 inversion polymorphisms are common among *Anopheles* spp. mosquitos, potentially  
276 enhancing the adaptability and vector potency of these primary malaria vectors (Ayala *et*  
277 *al.* 2014, 2017). Inversions in *Anopheles* spp. vary in karyotype frequencies across  
278 latitudinal clines and between mountain forests and lowland savannahs (Ayala *et al.*  
279 2017), and are associated with aridity tolerance.

280

281 Inversions and blocks of differentiation (which may or may not be associated with  
282 inversions) appear to underlie adaptation to salinity (Jones *et al.* 2012; Berg *et al.* 2015)  
283 and vary in frequency across latitudinal clines in marine fishes, suggesting an association  
284 with temperature or growing season length (Pettersson *et al.* 2019; Therkildsen *et al.*  
285 2019; Kess *et al.* 2020). Chromosomal translocations and fusions are common among  
286 salmonids (Phillips 2005). Their adaptive significance, if any, is not generally known,  
287 although a fusion in Atlantic salmon (Ssa08/Ssa29) is associated with summer  
288 precipitation in a Canadian river system (Wellband *et al.* 2019).

289

290 While we have focused on adaptation to abiotic environmental variables, traits controlled  
291 by linked architectures can also be associated with the biotic environment. For example,  
292 cryptic colouration in timena stick insects (Lindtke *et al.* 2017; Lucek *et al.* 2019) and  
293 mimicry patterns in butterflies (Joron *et al.* 2013; Nishikawa *et al.* 2015), associated with  
294 a large haplotype block and inversions, respectively, are under selection via local host plants  
295 and predators associated with particular environments. Changes in these environments

296 can alter camouflage substrates and predator distributions. Adaptation will therefore  
297 depend partly on the evolutionary dynamics of the linked regions.

298

299 *Linked architectures are also indirectly associated with environmental adaptation*

300

301 Architectures that link genes controlling several types of co-adapted traits can result in  
302 indirect selection on traits associated with environmental adaptation. The inversions in  
303 *Anopheles* spp. associated with differences in aridity tolerance (Cheng *et al.* 2018) are  
304 also associated with morphology and behaviour (reviewed by Ayala *et al.* 2014).  
305 Inversions underlie alternative reproductive phenotypes in some birds (Thomas *et al.*  
306 2008; Horton *et al.* 2014; Küpper *et al.* 2015; Zinzow-Kramer *et al.* 2015),  
307 simultaneously controlling morphological (e.g., plumage colouration), behavioural (e.g.,  
308 mating tactic), and life history (e.g., maturation, growth rate) traits. Common murre  
309 (*Uria aalge*) have a complex CNV maintaining linkage among genes associated with  
310 plumage colouration and thermal tolerance despite random mating (Tigano *et al.* 2018).

311

312 Alternate behavioural or life history strategies often impose different environmental  
313 selection pressures. Fish populations that migrate between freshwater and saltwater for  
314 reproduction and feeding require different temperature and salinity adaptations compared  
315 to resident populations that don't migrate. Consequently, linked architectures in marine  
316 and freshwater fishes are associated with coexisting migratory ecotypes experiencing  
317 different environments (Table 1; Pearse *et al.* 2014, 2019; Berg *et al.* 2016; Kirubakaran  
318 *et al.* 2016; Arostegui *et al.* 2019; Kess *et al.* 2019). For example, a double inversion in  
319 steelhead/rainbow trout (*Oncorhynchus mykiss*) varies in frequency between anadromous  
320 and resident populations, as well as between fluvial and adfluvial populations, and  
321 exhibits latitudinal- and temperature-associated frequency clines (Pearse *et al.* 2014,  
322 2019; Arostegui *et al.* 2019).

323

324 Variation in reproductive timing can require adaptations to different environmental  
325 conditions, such as different temperatures experienced during early life (Oomen &  
326 Hutchings 2015, 2016), which could favour architectures that link genes associated with

327 environmental and life history traits. An inversion in Atlantic herring (*Clupea harengus*)  
328 is associated with both temperature and timing of reproduction (Fuentes-Pardo *et al.*  
329 2019; Pettersson *et al.* 2019), whereas linked regions in Chinook salmon (*O. tshawytscha*;  
330 Narum *et al.* 2018) and steelhead (Micheletti *et al.* 2018) are associated with the timing  
331 of arrival to spawning grounds.

332

333 Many social traits in insects, birds, fishes, and plants are controlled by linked  
334 architectures due to bidirectional influences between social behaviour and genome  
335 architecture (reviewed by Rubenstein *et al.* 2019). For example, a supergene containing  
336 multiple chromosomal rearrangements underlies several social traits in the fire ant  
337 (*Solenopsis invicta*; Huang *et al.* 2018). The connection between social traits and linked  
338 architectures has broad relevance for predicting responses to environmental change, as  
339 sociality itself is often under environmental selection. For example, thermal stress and  
340 resource scarcity select for more or less sociality in different species and contexts (Kao *et*  
341 *al.* submitted; Doering *et al.* 2018). Further, social traits are often correlated with  
342 phenotypes that might be under selection from anthropogenic stressors such as climate  
343 change and harvesting (e.g. alternative mating tactics and growth rate in swordtail fish  
344 [*Xiphophorus* spp.; Lampert *et al.* 2010]).

345

346 Theory predicts that supergenes are also likely to arise when there is coevolution between  
347 social traits and dispersal, because dispersal will be selected against in benevolent  
348 individuals so that they tend to interact with relatives and selected for in selfish  
349 individuals so that they tend to interact with nonrelatives (Mullon *et al.* 2018; Rubenstein  
350 *et al.* 2019). Therefore, linkage between genes for dispersal traits (e.g., locomotion,  
351 physiology) and social behaviour is expected to evolve under a variety of circumstances  
352 (Rubenstein *et al.* 2019). As dispersal is one of the primary mechanisms of organismal  
353 responses to environmental change, control by linked architectures will likely alter  
354 predictions of responses to disturbance in a wide array of taxa.

355

356 Therefore, selection on diverse traits could indirectly impose selection on traits associated  
357 with environmental adaptation and incorporating linkage when modelling environmental  
358 responses has broad taxonomic utility.

359

### 360 **Flexible eco-genetic models can reflect a diversity of genomic architectures**

361

362 The best modelling strategy will depend on what is known regarding the genomic trait  
363 architecture. For most traits, the precise architecture is not known and is often estimated  
364 to consist of between 10 and 100 unlinked loci of equal effects (e.g., Kuperinen &  
365 Hutchings 2012). Given the rising prevalence of major effect loci and tightly linked  
366 architectures, exploring both extremes – single locus, representing both major effect and  
367 tightly linked loci, and highly polygenic, unlinked loci – is warranted. In reality, an  
368 intermediate architecture is likely. Yet, the output of these extreme scenarios will be  
369 informative about the range and distribution of possible outcomes and the sensitivity of  
370 the model to the genomic architecture in a particular case (e.g., life history or selection  
371 regime). As genomic information becomes available, more precise estimates of the  
372 number of loci, their effect sizes, and the degree of linkage among them can be  
373 incorporated into the inheritance kernel.

374

### 375 **Conclusion**

376

377 Despite the challenges in estimating LD and fitness effects of linked genomic  
378 architectures (Box 1), simple approximations can be obtained by treating them as single  
379 loci of large effect. This approach was shown to be more powerful for detecting  
380 genotype-environment associations between linked haploblocks in *Helianthus* sunflowers  
381 compared to characterizing genotypes based on SNPs within the blocks (Todesco *et al.*  
382 2019). When the genomic architecture is not known, a precautionary approach considers  
383 the greater variability and higher uncertainty that might be common under a single-locus  
384 scenario (also see Kardos & Luikart 2019). Rapid developments in the fields of  
385 recombination rate variation and the population genomics of structural variants will  
386 continue to improve predictions borne from genomic data.

387

388 Implementing genomic architecture into spatially or temporally explicit conservation and  
389 management plans presents additional considerations. For example, variable rates of gene  
390 flow within species could result in different genomic architectures underlying adaptation  
391 at different spatial and temporal scales (Nosil *et al.* 2009; Oomen 2019). The same trait  
392 could be under selection at both scales, as contrasting genomic architectures can produce  
393 similar phenotypic outcomes (Therkildsen *et al.* 2019). The diversity of genomic  
394 architectures underlying the same or different traits also complicates the process of  
395 delineating evolutionarily significant units for conservation, particularly when the relative  
396 fitness consequences of trait variation is unclear (Waples & Lindley 2018; Waples *et al.*  
397 2019). Nonetheless, it is clear that we must consider linked genomic architectures  
398 underlying adaptive traits when predicting the consequences of environmental  
399 disturbance to natural populations.

#### 400 **Box 1**

##### 401 **A better understanding of how linked architectures evolve is needed**

402

403 *Linkage disequilibrium should be included in theoretical models*

404

405 A major challenge to modelling the evolution of linked genomic architectures lies in  
406 estimating and parameterizing LD, which depends on the distance and epistasis among  
407 loci, chromosome size, position of loci along a chromosome, local sequence content, and  
408 other sources of recombination rate and gene conversion variation, such as genic  
409 modifiers and structural genomic polymorphisms (Figure 2; Kong *et al.* 2002; Butlin  
410 2005). Rates of recombination and gene conversion are difficult to estimate directly and  
411 vary within and among taxa. Fine-scale crossover maps (Rowan *et al.* 2019) and  
412 estimates of recombination (Guerrero & Kirkpatrick 2014) and gene conversion (Korunes  
413 & Noor 2019) rates can be obtained with high-throughput sequencing of the offspring of  
414 heterozygotes. LD can also be estimated from individual-level population-scale genomic  
415 data (Gianola *et al.* 2013; Bilton *et al.* 2018; Ragsdale & Gravel 2019). Yet, even if  
416 accurate estimates of LD are obtained for a particular set of environmental conditions,

417 recombination rates are often plastic (Stevison *et al.* 2017), complicating estimates of LD  
418 under environmental change.

419

420 *Linked architectures have fitness effects besides those of the target phenotype*

421

422 Besides effects of the trait that is the target of selection, other aspects of linked genomic  
423 architectures impact fitness and, consequently, the evolutionary trajectory of the  
424 architecture and trait. For example, linked architectures can prevent the purging of  
425 deleterious mutations, reducing the fitness of homozygotes (Jay *et al.* 2019). Conversely,  
426 heterozygotes for linked architectures can experience partial sterility due to the  
427 production of inviable gametes during meiosis, although strong evidence for this appears  
428 limited to plants (Hoffmann & Rieseberg 2008). Whether species outside of *Diptera* can  
429 displace crossovers away from the breakpoints of chromosomal rearrangements, thus  
430 altering their patterns of inheritance, is also poorly understood, as is taxonomic variation  
431 in other types of recombination modifiers. Further, there is some probability of  
432 developing genetic incompatibilities at linked loci, which could be modelled explicitly.  
433 Finally, a better understanding of how eco-evolutionary feedbacks shape genomic  
434 architectures is needed.

435

## 436 **Funding**

437

438 This work was supported by a James S. McDonnell Foundation 21<sup>st</sup> Century Postdoctoral  
439 Fellowship Award to RAO; the Academy of Finland to AK; the European Research  
440 Council (grant number COMPLEX-FISH 770884) to AK; the Natural Sciences and  
441 Engineering Research Council of Canada Discovery Grant to JAH; the Killam Trusts to  
442 JAH; and Loblaw Companies Limited to JAH. The present study reflects only the  
443 authors' view and the European Research Council is not responsible for any use that may  
444 be made of the information it contains.

445

## 446 **Acknowledgements**

447



448 We thank Marine Brieuc and Mitchell Newberry for helpful comments and discussion on  
449 aspects of the manuscript.

450

## 451 **References**

452

453 Aeschbacher S, Bürger R (2014) The effect of linkage on establishment and survival of  
454 locally beneficial mutations. *Genetics*, **197**, 317–336.

455 Akerman A, Bürger R (2014) The consequences of gene flow for local adaptation and  
456 differentiation: a two-locus two-deme model. *Journal of Mathematical Biology*, **68**,  
457 1135–1198.

458 Anderson AR, Hoffmann AA, McKechnie SW, Umina PA, Weeks AR (2005) The  
459 latitudinal cline in the In(3R)Payne inversion polymorphism has shifted in the last  
460 20 years in Australian *Drosophila melanogaster* populations. *Molecular Ecology*,  
461 **14**, 851–858.

462 Arostegui MC, Quinn TP, Seeb LW, Seeb JE, McKinney GJ (2019) Retention of a  
463 chromosomal inversion from an anadromous ancestor provides the genetic basis for  
464 alternative freshwater ecotypes in rainbow trout. *Molecular Ecology*, **28**, 1412–  
465 1427.

466 Ayala D, Acevedo P, Pombo M *et al.* (2017) Chromosome inversions and ecological  
467 plasticity in the main African malaria mosquitoes. *Evolution*, **71**, 686–701.

468 Ayala D, Ullastres A, González J (2014) Adaptation through chromosomal inversions in  
469 *Anopheles*. *Frontiers in Genetics*, **5**, 129.

470 Barrett RDH, Laurent S, Mallarino R *et al.* (2019) Linking a mutation to survival in wild  
471 mice. *Science*, **504**, 499–504.

472 Barrio AM, Lamichhaney S, Fan G *et al.* (2016) The genetic basis for ecological  
473 adaptation of the Atlantic herring revealed by genome sequencing. *eLife*, **5**, e12081.

474 Barson NJ, Aykanat T, Hindar K *et al.* (2015) Sex-dependent dominance at a single locus  
475 maintains variation in age at maturity in salmon. *Nature*, **528**, 405–408.

476 Barth JMI, Berg PR, Jonsson PR *et al.* (2017) Genome architecture enables local  
477 adaptation of Atlantic cod despite high connectivity. *Molecular Ecology*, **26**, 4452–  
478 4466.

479 Barth JMI, Villegas-Ríos D, Freitas C *et al.* (2019) Disentangling structural genomic and  
480 behavioural barriers in a sea of connectivity. *Molecular Ecology*, **28**, 1394–1411.

481 Baxter I, Brazelton JN, Yu D *et al.* (2010) A coastal cline in sodium accumulation in  
482 *Arabidopsis thaliana* is driven by natural variation of the sodium transporter  
483 AtHKT1;1. *PLoS Genetics*, **6**, e1001193.

484 Bay RA, Harrigan RJ, Underwood V Le *et al.* (2018) Genomic signals of selection  
485 predict climate-driven population declines in a migratory bird. *Science*, **86**, 83–86.

486 Bay RA, Rose N, Barrett R *et al.* (2017a) Predicting responses to contemporary  
487 environmental change using evolutionary response architectures. *The American*  
488 *Naturalist*, **189**, 463–473.

489 Bay RA, Rose NH, Logan CA, Palumbi SR (2017b) Genomic models predict successful  
490 coral adaptation if future ocean warming rates are reduced. *Science Advances*, **3**,  
491 e1701413.

492 Berg PR, Jentoft S, Star B *et al.* (2015) Adaptation to low salinity promotes genomic



- 493 divergence. *Genome Biology & Evolution*, **7**, 1644–1663.
- 494 Berg PR, Star B, Pampoulie C *et al.* (2016) Three chromosomal rearrangements promote  
495 genomic divergence between migratory and stationary ecotypes of Atlantic cod.  
496 *Scientific Reports*, 23246.
- 497 Berg PR, Star B, Pampoulie C *et al.* (2017) Trans-oceanic genomic divergence of  
498 Atlantic cod ecotypes is associated with large inversions. *Heredity*, **119**, 418–428.
- 499 Bidau CJ, Gimenez MD, Palmer CL, Searle JB (2001) The effects of Robertsonian  
500 fusions on chiasma frequency and distribution in the house mouse (*Mus musculus*  
501 *domesticus*) from a hybrid zone in northern Scotland. *Heredity*, **87**, 305–313.
- 502 Bilton TP, McEwan JC, Clarke SM *et al.* (2018) Linkage disequilibrium estimation in  
503 low coverage high-throughput sequencing data. *Genetics*, **209**, 389–400.
- 504 Bradbury IR, Hubert S, Higgins B *et al.* (2010) Parallel adaptive evolution of Atlantic  
505 cod on both sides of the Atlantic Ocean in response to temperature. *Proceedings of*  
506 *the Royal Society B: Biological Sciences*, **277**, 3725–3734.
- 507 Bürger R, Akerman A (2011) The effects of linkage and gene flow on local adaptation: a  
508 two-locus continent–island model. *Theoretical Population Biology*, **80**, 272–288.
- 509 Butlin RK (2005) Recombination and speciation. *Molecular Ecology*, **14**, 2621–2635.
- 510 Catanach A, Crowhurst R, Deng C *et al.* (2019) The genomic pool of standing structural  
511 variation outnumbers single nucleotide polymorphism by threefold in the marine  
512 teleost *Chrysophrys auratus*. *Molecular Ecology*, **28**, 1210–1223.
- 513 Cauwelier E, Gilbey J, Sampayo J, Stradmeyer L, Middlemas SJ (2018) Identification of  
514 a single genomic region associated with seasonal river return timing in adult Scottish  
515 Atlantic salmon (*Salmo salar*), using a genome-wide association study. *Canadian*  
516 *Journal of Fisheries and Aquatic Sciences*, **75**, 1427–1435.
- 517 Cayuela H, Rougemont Q, Laporte M *et al.* (2019) Standing genetic variation and  
518 chromosomal rearrangements facilitate local adaptation in a marine fish. *bioRxiv*, 1–  
519 48.
- 520 Charlesworth D, Charlesworth B (1979) Selection of recombination in a multi-locus  
521 system. *Genetics*, **91**, 575–580.
- 522 Cheng C, Tan JC, Hahn MW, Besansky NJ (2018) Systems genetic analysis of inversion  
523 polymorphisms in the malaria mosquito *Anopheles gambiae*. *Proceedings of the*  
524 *National Academy of Sciences*, **115**, E7005–E7014.
- 525 Christmas MJ, Wallberg A, Bunikis I *et al.* (2019) Chromosomal inversions associated  
526 with environmental adaptation in honeybees. *Molecular Ecology*, **28**, 1358–1374.
- 527 Colosimo PF, Peichel CL, Nereng K *et al.* (2004) The genetic architecture of parallel  
528 armor plate reduction in threespine sticklebacks. *PLoS Biology*, **2**, 635–641.
- 529 Coughlan JM, Willis JH (2019) Dissecting the role of a large chromosomal inversion in  
530 life history divergence throughout the *Mimulus guttatus* species complex. *Molecular*  
531 *Ecology*, **28**, 1343–1357.
- 532 Coulson T, Kendall BE, Barthold J *et al.* (2017) Modeling adaptive and nonadaptive  
533 responses of populations to environmental change. *American Naturalist*, **190**, 313–  
534 336.
- 535 Crow T, Ta J, Nojoomi S *et al.* (2019) Gene regulatory effects of a large chromosomal  
536 inversion in highland maize. *bioRxiv*, 1–30.
- 537 Doering GN, Scharf I, Moeller H V., Pruitt JN (2018) Social tipping points in animal  
538 societies in response to heat stress. *Nature Ecology and Evolution*, **2**, 1298–1305.

- 539 Faria R, Chaube P, Morales HE *et al.* (2019) Multiple chromosomal rearrangements in a  
540 hybrid zone between *Littorina saxatilis* ecotypes. *Molecular Ecology*, **28**, 1375–  
541 1393.
- 542 Feder ME, Walser J (2005) The biological limitations of transcriptomics in elucidating  
543 stress and stress responses. *Journal of Evolutionary Biology*, **18**, 901–910.
- 544 Fuentes-Pardo AP, Bourne C, Singh R *et al.* (2019) Adaptation to seasonal reproduction  
545 and thermal minima-related factors drives fine-scale divergence despite gene flow in  
546 Atlantic herring populations. *bioRxiv*, 1–48.
- 547 Fuller ZL, Haynes GD, Richards S, Schaeffer SW (2016) Genomics of natural  
548 populations: how differentially expressed genes shape the evolution of chromosomal  
549 inversions in *Drosophila pseudoobscura*. *Genetics*, **204**, 287–301.
- 550 Fuller ZL, Haynes GD, Richards S, Schaeffer SW (2017) Genomics of natural  
551 populations: evolutionary forces that establish and maintain gene arrangements in  
552 *Drosophila pseudoobscura*. *Molecular Ecology*, **26**, 6539–6562.
- 553 Gianola D, Qanbari S, Simianer H (2013) An evaluation of a novel estimator of linkage  
554 disequilibrium. *Heredity*, **111**, 275–285.
- 555 Griswold CK (2006) Gene flow’s effect on the genetic architecture of a local adaptation  
556 and its consequences for QTL analyses. *Heredity*, **96**, 445–453.
- 557 Guerrero RF, Kirkpatrick M (2014) Local adaptation and the evolution of chromosome  
558 fusions. *Evolution*, **68**, 2747–2756.
- 559 Guillén Y, Ruiz A (2012) Gene alterations at *Drosophila* inversion breakpoints provide  
560 *prima facie* evidence for natural selection as an explanation for rapid chromosomal  
561 evolution. *BMC Genomics*, **13**, 53.
- 562 Hoban S, Kelley JL, Lotterhos KE *et al.* (2016) Finding the genomic basis of local  
563 adaptation: pitfalls, practical solutions, and future directions. *The American*  
564 *Naturalist*, **188**, 379–397.
- 565 Hoffmann A, Griffin P, Dillon S *et al.* (2015) A framework for incorporating  
566 evolutionary genomics into biodiversity conservation and management. *Climate*  
567 *Change Responses*, **2**, 1.
- 568 Hoffmann AA, Rieseberg LH (2008) Revisiting the impact of inversions in evolution:  
569 from population genetic markers to drivers of adaptive shifts and speciation? *Annual*  
570 *Review of Ecology, Evolution, and Systematics*, **39**, 21–42.
- 571 Hooper DM (2016) Range overlap drives chromosome inversion fixation in Passerine  
572 birds. *bioRxiv*, 1–46.
- 573 Horton BM, Moore IT, Maney DL (2014) New insights into the hormonal and  
574 behavioural correlates of polymorphism in white-throated sparrows, *Zonotrichia*  
575 *albicollis*. *Animal Behaviour*, **93**, 207–219.
- 576 Huang Y-C, Dang VD, Chang N-C, Wang J (2018) Multiple large inversions and  
577 breakpoint rewiring of gene expression in the evolution of the fire ant social  
578 supergene. *Proceedings of the Royal Society B Biological Sciences*, **285**, 20180221.
- 579 IPBES, Díaz S, Settele J, Brondizio E (2019) *Summary for policymakers of the global*  
580 *assessment report on biodiversity and ecosystem services of the Intergovernmental*  
581 *Science-Policy Platform on Biodiversity and Ecosystem Services*.
- 582 IPCC (2018) IPCC, 2018: Summary for Policymakers. In: *Global warming of 1.5°C. An*  
583 *IPCC Special Report on the impacts of global warming of 1.5°C above pre-*  
584 *industrial levels and related global greenhouse gas emission pathways, in the*

- 585 *context of strengthening the global response to the threat of climate change*, (eds  
586 Masson-Delmotte V, Zhai P, Pörtner H-O, et al.)  
587 Jay P, Chouteau M, Whibley A *et al.* (2019) Mutation accumulation in chromosomal  
588 inversions maintains wing pattern polymorphism in a butterfly. *bioRxiv*, 1–8.  
589 Jiménez-Mena B, Le Moan A, Christensen A *et al.* (2019) Weak genetic structure despite  
590 strong genomic signal in lesser sandeel in the North Sea. *Evolutionary Applications*,  
591 **13**, 376–387.  
592 Johnston SE, Gratten J, Berenos C *et al.* (2013) Life history trade-offs at a single locus  
593 maintain sexually selected genetic variation. *Nature*, **502**, 93–95.  
594 Johnston SE, Orell P, Pritchard VL *et al.* (2014) Genome-wide SNP analysis reveals a  
595 genetic basis for sea-age variation in a wild population of Atlantic salmon (*Salmo*  
596 *salar*). *Molecular Ecology*, **23**, 3452–3468.  
597 Jones FC, Grabherr MG, Chan YF *et al.* (2012) The genomic basis of adaptive evolution  
598 in threespine sticklebacks. *Nature*, **484**, 55–61.  
599 Jones MR, Mills LS, Alves PC *et al.* (2018) Adaptive introgression underlies  
600 polymorphic seasonal camouflage in snowshoe hares. *Science*, **360**, 1355–1358.  
601 Joron M, Frezal L, Jones RT *et al.* (2013) Chromosomal rearrangements maintain a  
602 polymorphic supergene controlling butterfly mimicry. *Nature*, **477**, 203–206.  
603 Kao AB, Hund AK, Bhat D *et al.* (in review) Changes in group size under resource  
604 scarcity reflect drivers of sociality across taxa. *Nature Ecology & Evolution*.  
605 Kapun M, Fabian DK (2016) Genomic evidence for adaptive inversion clines in  
606 *Drosophila melanogaster*. *Molecular Biology and Evolution*, **33**, 1317–1336.  
607 Kapun M, Flatt T (2019) The adaptive significance of chromosomal inversion  
608 polymorphisms in *Drosophila melanogaster*. *Molecular Ecology*, **28**, 1263–1282.  
609 Kardos M, Luikart G (2019) The genomic architecture of fitness is a major driver of  
610 population viability during rapid environmental change. *bioRxiv*, 1–36.  
611 Kardos M, Luikart G, Bunch R *et al.* (2015) Whole-genome resequencing uncovers  
612 molecular signatures of natural and sexual selection in wild bighorn sheep.  
613 *Molecular Ecology*, **24**, 5616–5632.  
614 Kess T, Bentzen P, Lehnert SJ *et al.* (2019) A migration-associated supergene reveals  
615 loss of biocomplexity in Atlantic cod. *Science Advances*, **5**, eaav2461.  
616 Kess T, Bentzen P, Lehnert SJ *et al.* (2020) Modular chromosome rearrangements reveal  
617 parallel and nonparallel adaptation in a marine fish. *Ecology and Evolution*, 1–16.  
618 Kirkpatrick M, Barrett B (2015) Chromosome inversions, adaptive cassettes and the  
619 evolution of species' ranges. *Molecular Ecology*, **24**, 2046–2055.  
620 Kirkpatrick M, Barton N (2006) Chromosome inversions, local adaptation and speciation.  
621 *Genetics*, **173**, 419–434.  
622 Kirubakaran TG, Grove H, Kent MP *et al.* (2016) Two adjacent inversions maintain  
623 genomic differentiation between migratory and stationary ecotypes of Atlantic cod.  
624 *Molecular Ecology*, **25**, 2130–2143.  
625 Kivimäki M, Kärkkäinen K, Gaudeul M, Løe G, Ågren J (2007) Gene, phenotype and  
626 function: GLABROUS1 and resistance to herbivory in natural populations of  
627 *Arabidopsis lyrata*. *Molecular Ecology*, **16**, 453–462.  
628 Kong A, Gudbjartsson DF, Sainz J *et al.* (2002) A high-resolution recombination map of  
629 the human genome. *Nature Genetics*, **31**, 241–247.  
630 Korunes KL, Noor MAF (2019) Pervasive gene conversion in chromosomal inversion

- 631 heterozygotes. *Molecular Ecology*, **28**, 1302–1315.
- 632 Krimbas CB, Powell JR (1992) *Drosophila inversion polymorphism*. CRC Press.
- 633 Kuparinen A, Hutchings JA (2012) Consequences of fisheries-induced evolution for  
634 population productivity and recovery potential. *Proceedings of the Royal Society B*  
635 *Biological Sciences*, **279**, 2571–2579.
- 636 Kuparinen A, Hutchings JA (2017) Genetic architecture of age at maturity can generate  
637 divergent and disruptive harvest-induced evolution. *Philosophical Transactions of*  
638 *the Royal Society of London - Series B: Biological Sciences*, **372**, 20160035.
- 639 Küpper C, Stocks M, Risse JE *et al.* (2015) A supergene determines highly divergent  
640 male reproductive morphs in the ruff. *Nature Genetics*, **48**, 79–83.
- 641 Lamichhaney S, Fuentes-Pardo AP, Rafati N *et al.* (2017) Parallel adaptive evolution of  
642 geographically distant herring populations on both sides of the North Atlantic  
643 Ocean. *Proceedings of the National Academy of Sciences*, **114**, E3452–E3461.
- 644 Lampert KP, Schmidt C, Fischer P *et al.* (2010) Report determination of onset of sexual  
645 maturation and mating behavior by melanocortin receptor 4 polymorphisms. *Current*  
646 *Biology*, **20**, 1729–1734.
- 647 Lee C-R, Wang B, Mojica JP *et al.* (2017) Young inversion with multiple linked QTLs  
648 under selection in a hybrid zone. *Nature Ecology and Evolution*, **1**, 0119.
- 649 Lindtke D, Lucek K, Soria-Carrasco V *et al.* (2017) Long-term balancing selection on  
650 chromosomal variants associated with crypsis in a stick insect. *Molecular Ecology*,  
651 **26**, 6189–6205.
- 652 Lowry DB, Willis JH (2010) A widespread chromosomal inversion polymorphism  
653 contributes to a major life-history transition, local adaptation, and reproductive  
654 isolation. *PLoS Biology*, **8**, e1000500.
- 655 Lucek K, Gompert Z, Nosil P (2019) The role of structural genomic variants in  
656 population differentiation and ecotype formation in *Timema cristinae* walking sticks.  
657 *Molecular Ecology*, **28**, 12274–1237.
- 658 Merot C, Berdan EL, Babin C *et al.* (2018) Intercontinental karyotype – environment  
659 parallelism supports a role for a chromosomal inversion in local adaptation in a  
660 seaweed fly. *Proceedings of the Royal Society B Biological Sciences*, **285**,  
661 20180519.
- 662 Mérot C, Llaurens V, Normandeau E, Bernatchez L, Wellenreuther M (2019) Balancing  
663 selection via life-history trade-offs maintains an inversion polymorphism in a  
664 seaweed fly. *bioRxiv*, 1–18.
- 665 Mérot C, Oomen RA, Tigano A, Wellenreuther M (in review) A roadmap towards  
666 understanding the evolutionary significance of structural genomic variation. *Trends*  
667 *in Ecology & Evolution*.
- 668 Merritt JR, Grogan KE, Zinzow-Kramer WM *et al.* (2020) A behavioral polymorphism  
669 caused by a single gene inside a supergene. *bioRxiv*, 1–9.
- 670 Micheletti SJ, Hess JE, Zandt JS, Narum SR (2018) Selection at a genomic region of  
671 major effect is responsible for evolution of complex life histories in anadromous  
672 steelhead. *BMC Evolutionary Biology*, **18**, 140.
- 673 Le Moan A, Bekkevold D, Hemmer-Hansen J (2019a) Evolution at two time-frames:  
674 ancient and singular origin of two structural variants involved in local adaptation of  
675 the European plaice (*Pleuronectes platessa*). *bioRxiv*, 1–38.
- 676 Le Moan A, Gaggiotti O, Henriques R *et al.* (2019b) Beyond parallel evolution: when



- 677 several species colonize the same environmental gradient. *bioRxiv*, 1–43.
- 678 Morales HE, Faria R, Johannesson K *et al.* (2019) Genomic architecture of parallel  
679 ecological divergence: beyond a single environmental contrast. *Science Advances*, **5**,  
680 eaav9963.
- 681 Mullon C, Keller L, Lehmann L (2018) Social polymorphism is favoured by the co-  
682 evolution of dispersal with social behaviour. *Nature Ecology & Evolution*, **2**, 132–  
683 140.
- 684 Narum SR, Genova A Di, Micheletti SJ, Maass A (2018) Genomic variation underlying  
685 complex life-history traits revealed by genome sequencing in Chinook salmon.  
686 *Proceedings of the Royal Society B Biological Sciences*, **285**, 20180935.
- 687 Nishikawa H, Iijima T, Kajitani R *et al.* (2015) A genetic mechanism for female-limited  
688 Batesian mimicry in *Papilio* butterfly. *Nature Genetics*, **47**, 405–409.
- 689 Nosil P, Funk DJ, Ortiz-Barrientos D (2009) Divergent selection and heterogeneous  
690 genomic divergence. *Molecular Ecology*, **18**, 375–402.
- 691 Oomen RA (2019) The genomic basis and spatial scale of variation in thermal responses  
692 of Atlantic cod (*Gadus morhua*). Doctoral thesis. Dalhousie University.
- 693 Oomen RA, Hutchings JA (2015) Variation in spawning time promotes genetic  
694 variability in population responses to environmental change in a marine fish.  
695 *Conservation Physiology*, **3**, 1–12.
- 696 Oomen RA, Hutchings JA (2016) Genetic variation in plasticity of life-history traits  
697 between Atlantic cod (*Gadus morhua*) populations exposed to contrasting thermal  
698 regimes. *Canadian Journal of Zoology*, **94**, 257–264.
- 699 Orr HA, Unckless RL (2014) The population genetics of evolutionary rescue. *PLoS*  
700 *Genetics*, **10**, e1004551.
- 701 Ortiz-Barrientos D, Engelstädter J, Rieseberg LH (2016) Recombination rate evolution  
702 and the origin of species. *Trends in Ecology and Evolution*, **31**, 226–236.
- 703 Palumbi SR, Barshis DJ, Traylor-Knowles N, Bay RA (2014) Mechanisms of reef coral  
704 resistance to future climate change. *Science*, **344**, 895–899.
- 705 Pang AW, Macdonald JR, Pinto D *et al.* (2010) Towards a comprehensive structural  
706 variation map of an individual human genome. *Genome Biology*, **11**, R52.
- 707 Pearse DE, Barson NJ, Nome T *et al.* (2019) Sex-dependent dominance maintains  
708 migration supergene in rainbow trout. *Nature Ecology & Evolution*, **3**, 1–12.
- 709 Pearse DE, Miller MR, Abadia-Cardoso A, Garza JC (2014) Rapid parallel evolution of  
710 standing variation in a single, complex genomic region is associated with life  
711 history in steelhead/rainbow trout. *Proceedings of the Royal Society B Biological*  
712 *Sciences*, **281**, 20140012.
- 713 Pettersson ME, Rochus CM, Han F *et al.* (2019) A chromosome-level assembly of the  
714 Atlantic herring – detection of a supergene and other signals of selection. *bioRxiv*,  
715 1–49.
- 716 Phillips RB (2005) Chromosome morphology. In: *Stock Identification Methods* (eds  
717 Cadrin SX, Friedland KD, Waldman JR), pp. 273–294. Elsevier, Amsterdam,  
718 Netherlands.
- 719 Ragsdale AP, Gravel S (2019) Unbiased estimation of linkage disequilibrium from  
720 unphased data. *Molecular Biology and Evolution*, 1–10.
- 721 Rane R V, Rako L, Kapun M, Lee SF, Hoffmann AA (2015) Genomic evidence for role  
722 of inversion 3RP of *Drosophila melanogaster* in facilitating climate change

- 723 adaptation. *Molecular Ecology*, **24**, 2423–2432.
- 724 Rieseberg LH (2001) Chromosomal rearrangements and speciation. *Trends in Ecology &*  
725 *Evolution*, **16**, 351–358.
- 726 Rogers SM, Mee JA, Bowles E (2011) The consequences of genomic architecture on  
727 ecological speciation in postglacial fishes. *Current Zoology*, **59**, 53–71.
- 728 Rowan BA, Heavens D, Feuerborn TR *et al.* (2019) An ultra high-density *Arabidopsis*  
729 *thaliana* crossover map that refines the influences of structural variation and  
730 epigenetic features. *Genetics*, **213**, 771–787.
- 731 Rubenstein DR, Ågren JA, Carbone L *et al.* (2019) Coevolution of genome architecture  
732 and social behavior. *Trends in Ecology & Evolution*, **34**, 844–855.
- 733 Savolainen O, Lascoux M, Merilä J (2013) Ecological genomics of local adaptation.  
734 *Nature Reviews Genetics*, **14**, 807–820.
- 735 Schaeffer SW (2008) Selection in heterogeneous environments maintains the gene  
736 arrangement polymorphism of *Drosophila pseudoobscura*. *Evolution*, **62**, 3082–  
737 3099.
- 738 Schwander T, Libbrecht R, Keller L (2014) Supergenes and complex phenotypes.  
739 *Current Biology*, **24**, R288–R294.
- 740 Sodeland M, Jorde PE, Lien S *et al.* (2016) “Islands of Divergence” in the Atlantic cod  
741 genome represent polymorphic chromosomal rearrangements. *Genome Biology &*  
742 *Evolution*, **8**, 1012–1022.
- 743 Stevison LS, Sefick S, Rushton C, Graze RM (2017) Recombination rate plasticity:  
744 revealing mechanisms by design. *Philosophical Transactions of the Royal Society B:*  
745 *Biological Sciences*, **372**, 20160459.
- 746 Sturtevant AH (1921) A case of rearrangement of genes in *Drosophila*. *Proceedings of*  
747 *the National Academy of Sciences*, **7**, 235–237.
- 748 Therkildsen NO, Wilder AP, Conover DO *et al.* (2019) Contrasting genomic shifts  
749 underlie parallel phenotypic evolution in response to fishing. *Science*, **490**, 487–490.
- 750 Thomas JW, Cáceres M, Lowman JJ *et al.* (2008) The chromosomal polymorphism  
751 linked to variation in social behavior in the white-throated sparrow (*Zonotrichia*  
752 *albicollis*) is a complex rearrangement and suppressor of recombination. *Genetics*,  
753 **179**, 1455–1468.
- 754 Thompson TQ, Bellinger MR, Rourke SMO *et al.* (2019) Anthropogenic habitat  
755 alteration leads to rapid loss of adaptive variation and restoration potential in wild  
756 salmon populations. *Proceedings of the Royal Society B Biological Sciences*, **116**,  
757 177–186.
- 758 Tigano A, Friesen VL (2016) Genomics of local adaptation with gene flow. *Molecular*  
759 *Ecology*, **25**, 2144–2164.
- 760 Tigano A, Reiertsen TK, Walters JR, Friesen VL (2018) A complex copy number variant  
761 underlies differences in both colour plumage and cold adaptation in a dimorphic  
762 seabird. *bioRxiv*, 1–14.
- 763 Todesco M, Owens GL, Bercovich N *et al.* (2019) Massive haplotypes underlie ecotypic  
764 differentiation in sunflowers. *bioRxiv*, 1–66.
- 765 Toews DPL, Taylor SA, Streby HM, Kramer GR, Lovette IJ (2019) Selection on  
766 VPS13A linked to migration in a songbird. *Proceedings of the National Academy of*  
767 *Sciences of the United States of America*, **116**, 18272–18274.
- 768 Twyford AD, Friedman J (2015) Adaptive divergence in the monkey flower *Mimulus*

- 769 *guttatus* is maintained by a chromosomal inversion. *Evolution*, **69**, 1476–1486.
- 770 Veale AJ, Russello MA (2017) An ancient selective sweep linked to reproductive life  
771 history evolution in sockeye salmon. *Scientific Reports*, **7**, 1747.
- 772 Wallberg A, Schöning C, Webster MT, Hasselmann M (2017) Two extended haplotype  
773 blocks are associated with adaptation to high altitude habitats in East African honey  
774 bees. *PLoS Genetics*, **13**, 1–30.
- 775 Waples RS, Lindley ST (2018) Genomics and conservation units: the genetic basis of  
776 adult migration timing in Pacific salmonids. *Evolutionary Applications*, **11**, 1518–  
777 1526.
- 778 Waples RS, Naish KA, Primmer CR (2019) Conservation and management of salmon in  
779 the age of genomics. *Annual Review of Animal Biosciences*, **8**, 1–27.
- 780 Wellband K, Mérot C, Linnansaari T *et al.* (2019) Chromosomal fusion and life history-  
781 associated genomic variation contribute to within-river local adaptation of Atlantic  
782 salmon. *Molecular Ecology*, **28**, 1439–1459.
- 783 Wellenreuther M, Bernatchez L (2018) Eco-evolutionary genomics of chromosomal  
784 inversions. *Trends in Ecology and Evolution*, **33**, 427–440.
- 785 Wellenreuther M, Mérot C, Berdan E, Bernatchez L (2019) Going beyond SNPs: the role  
786 of structural genomic variants in adaptive evolution and species diversification.  
787 *Molecular Ecology*, **28**, 1203–1209.
- 788 Wu C-I (2001) The genic view of the process of speciation. *Journal of Evolutionary*  
789 *Biology*, **14**, 851–865.
- 790 Yeaman S (2013) Genomic rearrangements and the evolution of clusters of locally  
791 adaptive loci. *Proceedings of the National Academy of Sciences*, **110**, E1743–  
792 E1751.
- 793 Yeaman S, Otto SP (2011) Establishment and maintenance of adaptive genetic  
794 divergence under migration, selection, and drift. *Evolution*, **65**, 2123–2129.
- 795 Yeaman S, Whitlock MC (2011) The genetic architecture of adaptation under migration-  
796 selection balance. *Evolution*, **65**, 1897–1911.
- 797 Zinzow-Kramer WM, Horton BM, Mckee CD *et al.* (2015) Genes located in a  
798 chromosomal inversion are correlated with territorial song in white-throated  
799 sparrows. *Genes, Brain and Behavior*, **14**, 641–654.
- 800

801 **Table captions**

802

803 Table 1: Genomic regions in linkage disequilibrium that are associated with  
804 environmental or life history traits under selection.

805

806 **Figure captions**

807

808 Figure 1: The evolution of age at maturity in Atlantic salmon in response to fishing under  
809 hypothetical (a,c) single- and (b,d) multi-locus scenarios for genetic architecture of the  
810 trait. The beginning and end of the fishing period with fishing mortality of 0.20 are  
811 indicated by dashed vertical lines. Each line represents one replicate simulation ( $N=10$ ).  
812 The top panels show all replicate simulations overlaid on each other, whereas the bottom  
813 panels show each replicate on a separate row.

814

815 Figure 2: Linkage disequilibrium exists on a spectrum influenced by several factors  
816 potentially affecting recombination rate ( $r$ ) among loci. Rather than a mechanistically  
817 accurate diagram, consider this figure as a roughly organized corkboard onto which the  
818 various factors and conditions have been pinned.

819

820 Figure 3: Hypothetical genomic architectures (top row), corresponding model parameters  
821 (middle row), and evolutionary simulations (bottom row) for a polygenic trait in a diploid  
822 individual with two chromosomes that is under a temporary period of directional  
823 selection (grey bars): (a) a single locus of large effect, (b) ten loci of small effect with  
824 negligible linkage disequilibrium (LD), and (c) ten loci of small effect with strong LD.  
825 Red bars indicate the position of individual loci along a chromosome. Model parameters  
826 include the number of loci ( $N_{\text{loci}}$ ), their effect sizes, and the degree of LD among them  
827 (when applicable), whereby continuous dashed lines indicate negligible levels of LD and  
828 continuous solid lines indicate strong LD. Individual black lines represent hypothetical  
829 replicate simulations ( $N=3$ ).



Table 1: Genomic regions in linkage disequilibrium that are associated with environmental or life history traits under selection.

| Species name                     | Common name           | Variant architecture            | Variant names and/or locations               | Associated phenotype                                                       | References                                                                                                             |
|----------------------------------|-----------------------|---------------------------------|----------------------------------------------|----------------------------------------------------------------------------|------------------------------------------------------------------------------------------------------------------------|
| Plants                           |                       |                                 |                                              |                                                                            |                                                                                                                        |
| <i>Boechera stricta</i>          | Drummond's rockcress  | inversion                       | LG1                                          | environmental adaptation (water regime)                                    | (Lee <i>et al.</i> 2017)                                                                                               |
| <i>Helianthus</i> spp.           | sunflower             | haploblocks and inversions      | genome-wide ( $N=37$ )                       | environmental adaptation (climate) and reproduction (morphology)           | (Todesco <i>et al.</i> 2019)                                                                                           |
| <i>Mimulus guttatus</i>          | monkeyflower          | inversion                       | DIV1 on chromosome 8                         | perenniality                                                               | (Lowry & Willis 2010; Twyford & Friedman 2015; Coughlan & Willis 2019)                                                 |
| <i>Zea mays</i> ssp. <i>mays</i> | highland maize        | inversion                       | Inv4m                                        | environmental adaptation (highland)                                        | (Crow <i>et al.</i> 2019)                                                                                              |
| Invertebrates                    |                       |                                 |                                              |                                                                            |                                                                                                                        |
| <i>Anopheles</i> spp.            | mosquito              | inversions                      | genome-wide ( $N=17$ )                       | environmental adaptation (latitudinal clines, altitude-associated habitat) | (Ayala <i>et al.</i> 2014, 2017)                                                                                       |
| <i>Apis mellifera</i>            | East African honeybee | inversions                      | r7, r9                                       | environmental adaptation (altitude-associated habitat)                     | (Wallberg <i>et al.</i> 2017; Christmas <i>et al.</i> 2019)                                                            |
| <i>Coelopa frigida</i>           | seaweed fly           | inversion                       | chromosome 1                                 | environmental adaptation (latitudinal clines)                              | (Merot <i>et al.</i> 2018; Mérot <i>et al.</i> 2019)                                                                   |
| <i>Drosophila melanogaster</i>   | fruit fly             | inversions                      | In(3R)Payne (3RP), In(3L)P, In(3R)C, In(2L)t | environmental adaptation (latitudinal and altitudinal clines)              | (Krimbas & Powell 1992; Anderson <i>et al.</i> 2005; Rane <i>et al.</i> 2015; Kapun & Fabian 2016; Kapun & Flatt 2019) |
| <i>Drosophila mojavensis</i>     | fruit fly             | inversions                      | chromosome 2 ( $N=7$ )                       | environmental adaptation (desert and/or host plant)                        | (Guillén & Ruiz 2012)                                                                                                  |
| <i>Drosophila pseudoobscura</i>  | fruit fly             | inversions                      | AR, PP, CH, ST, TL                           | environmental adaptation (latitudinal clines)                              | (Schaeffer 2008; Fuller <i>et al.</i> 2016, 2017)                                                                      |
| <i>Littorina saxatilis</i>       | rough periwinkle      | inversions, putative inversions | genome-wide ( $N=17$ )                       | environmental adaptation (wave vs. crab ecotype, low-shore vs. high shore) | (Faria <i>et al.</i> 2019; Morales <i>et al.</i> 2019)                                                                 |
| Teleosts                         |                       |                                 |                                              |                                                                            |                                                                                                                        |

| Species name                    | Common name         | Variant architecture     | Variant names and/or locations | Associated phenotype                                                                                                                   | References                                                                                                                   |
|---------------------------------|---------------------|--------------------------|--------------------------------|----------------------------------------------------------------------------------------------------------------------------------------|------------------------------------------------------------------------------------------------------------------------------|
| <i>Gadus morhua</i>             | Atlantic cod        | inversions               | LG02, LG07, LG12               | environmental adaptation (latitudinal and salinity clines)                                                                             | (Bradbury <i>et al.</i> 2010; Berg <i>et al.</i> 2015; Sodeland <i>et al.</i> 2016; Barth <i>et al.</i> 2017, 2019)          |
|                                 |                     | inversion                | LG01                           | migratory behaviour                                                                                                                    |                                                                                                                              |
| <i>Menidia menidia</i>          | Atlantic silverside | block of differentiation | chromosome 24                  | environmental adaptation (latitudinal clines), growth                                                                                  | (Therkildsen <i>et al.</i> 2019)                                                                                             |
| <i>Salmo salar</i>              | Atlantic salmon     | fusion                   | Ssa08/Ssa29                    | environmental adaptation (summer precipitation)                                                                                        | (Wellband <i>et al.</i> 2019)                                                                                                |
|                                 |                     | linked genomic region    | Ssa09                          | sea age at maturity, run timing                                                                                                        | (Johnston <i>et al.</i> 2014; Barson <i>et al.</i> 2015; Cauwelier <i>et al.</i> 2018)                                       |
| <i>Oncorhynchus mykiss</i>      | rainbow trout       | double inversion         | Omy05                          | migratory behaviour (anadromous vs. resident and fluvial vs. adfluvial), environmental adaptation (latitudinal and temperature clines) | (Pearse <i>et al.</i> 2014, 2019; Arostegui <i>et al.</i> 2019)                                                              |
| <i>Oncorhynchus nerka</i>       | sockeye salmon      | linked genomic region    | Ssa09 homolog                  | environmental adaptation (stream- vs. lake-spawning ecotypes)                                                                          | (Veale & Russello 2017)                                                                                                      |
| <i>Clupea harengus</i>          | Atlantic herring    | inversion                | chromosome 12                  | environmental adaptation (latitudinal clines), spawning time                                                                           | (Barrio <i>et al.</i> 2016; Lamichhaney <i>et al.</i> 2017; Fuentes-Pardo <i>et al.</i> 2019; Pettersson <i>et al.</i> 2019) |
| <i>Oncorhynchus tshawytscha</i> | Chinook salmon      | linked genomic region    | Ots28                          | timing of arrival to spawning grounds                                                                                                  | (Narum <i>et al.</i> 2018)                                                                                                   |
| <i>Ammodytes tobianus</i>       | lesser sandeel      | haploblock               | unknown (13 linked SNPs)       | putative environmental adaptation (sea bottom temperature)                                                                             | (Jiménez-Mena <i>et al.</i> 2019)                                                                                            |
| <i>Oncorhynchus mykiss</i>      | steelhead trout     | linked genomic region    | Omy28                          | migration timing                                                                                                                       | (Micheletti <i>et al.</i> 2018)                                                                                              |
| <i>Mallotus villosus</i>        | capelin             | fusion                   | chromosome 2 and 9             | environmental adaptation (spawning site, temperature)                                                                                  | (Cayuela <i>et al.</i> 2019)                                                                                                 |

| <b>Species name</b>           | <b>Common name</b>       | <b>Variant architecture</b> | <b>Variant names and/or locations</b> | <b>Associated phenotype</b>                                | <b>References</b>                |
|-------------------------------|--------------------------|-----------------------------|---------------------------------------|------------------------------------------------------------|----------------------------------|
| <i>Gasterosteus aculeatus</i> | three-spined stickleback | inversions                  | chromosome 1, 11, and 21              | environmental adaptation (marine vs. freshwater)           | (Jones <i>et al.</i> 2012)       |
| <i>Pleuronectes platessa</i>  | European plaice          | putative inversions         | SV19, SV21                            | environmental adaptation (latitudinal and salinity clines) | (Le Moan <i>et al.</i> 2019a; b) |
| <i>Uria aalge</i>             | common murre             | complex copy number variant | scaffold 72                           | plumage colouration, thermal adaptation                    | (Tigano <i>et al.</i> 2018)      |

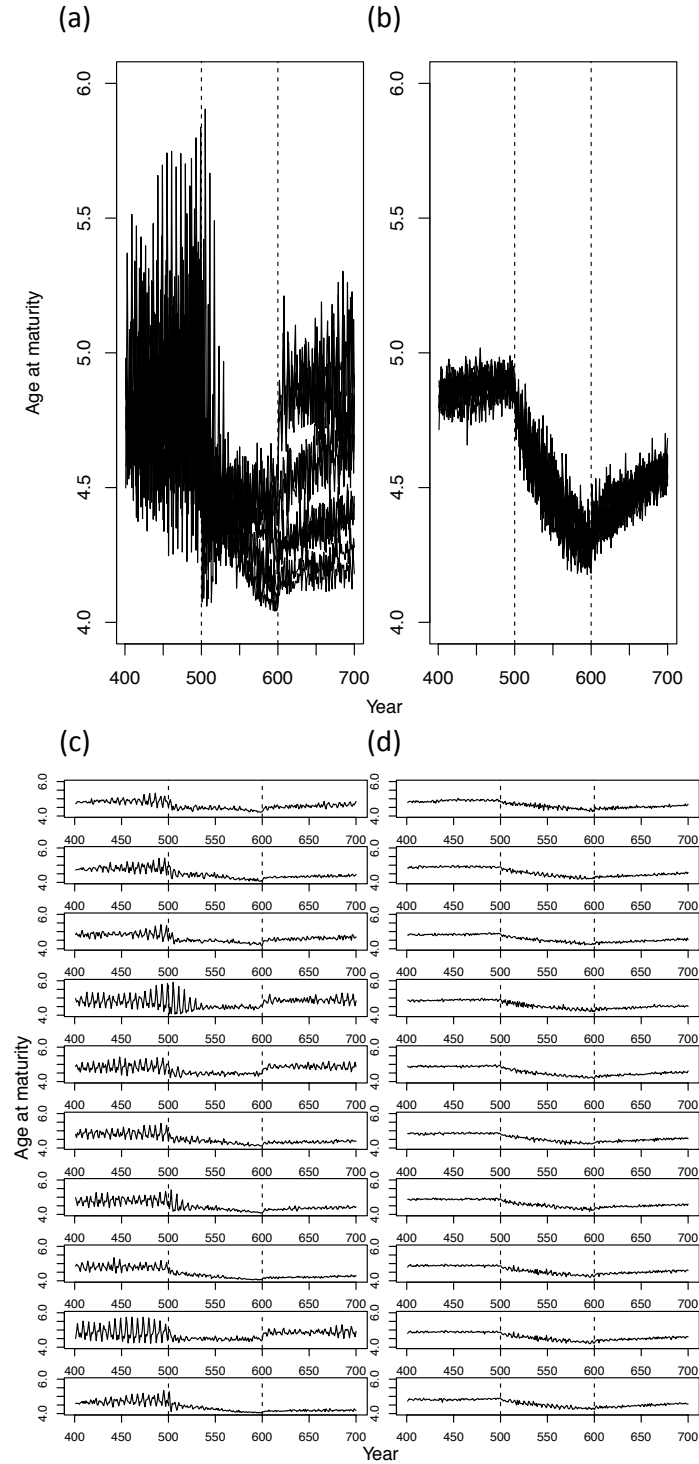

Figure 1: The evolution of age at maturity in Atlantic salmon in response to fishing under hypothetical (a,c) single- and (b,d) multi-locus scenarios for genetic architecture of the trait. The beginning and end of the fishing period with fishing mortality of 0.20 are indicated by dashed vertical lines. Each line represents one replicate simulation ( $N=10$ ). The top panels show all replicate simulations overlaid on each other, whereas the bottom panels show each replicate on a separate row.

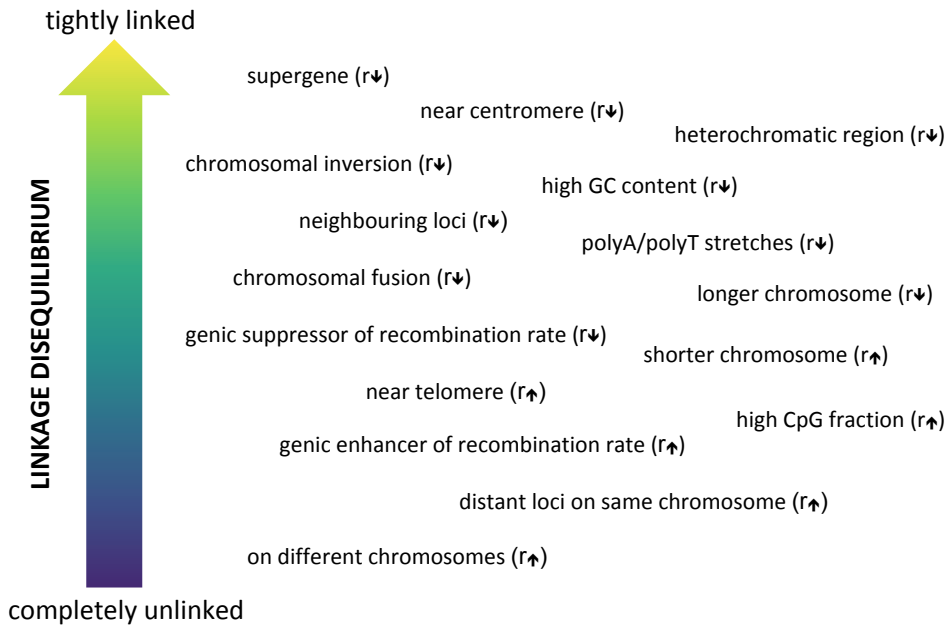

Figure 2: Linkage disequilibrium exists on a spectrum influenced by several factors potentially affecting recombination rate ( $r$ ) among loci. Rather than a mechanistically accurate diagram, consider this figure as a roughly organized corkboard onto which the various factors and conditions have been pinned.

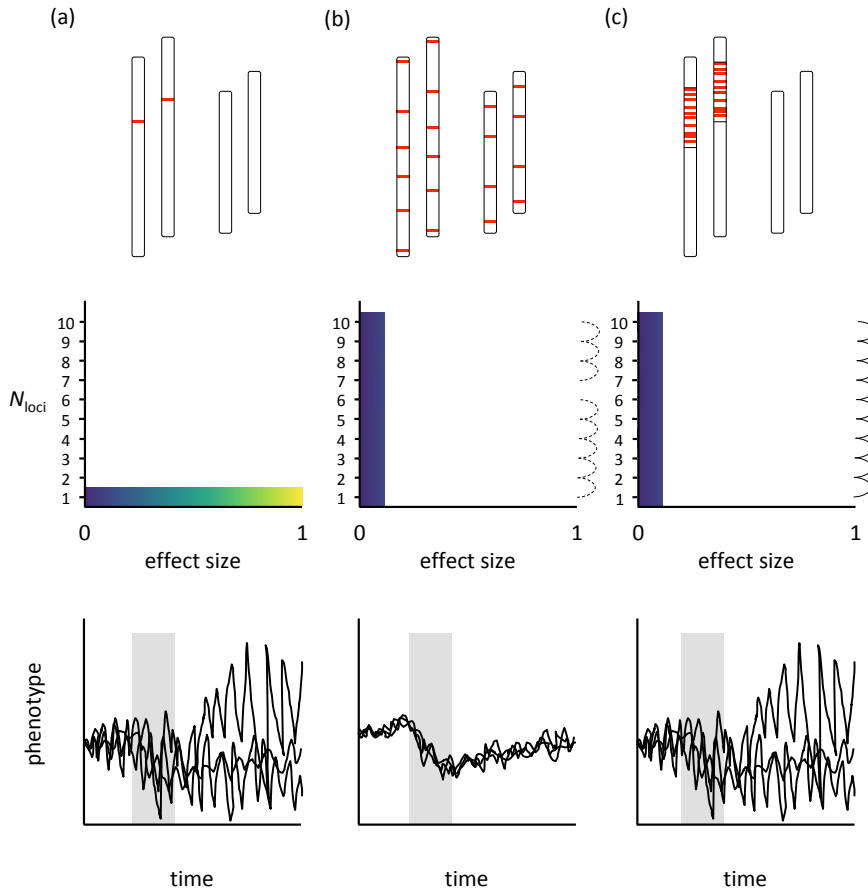

Figure 3: Hypothetical genomic architectures (top row), corresponding model parameters (middle row), and evolutionary simulations (bottom row) for a polygenic trait in a diploid individual with two chromosomes that is under a temporary period of directional selection (grey bars): (a) a single locus of large effect, (b) ten loci of small effect with negligible linkage disequilibrium (LD), and (c) ten loci of small effect with strong LD. Red bars indicate the position of individual loci along a chromosome. Model parameters include the number of loci ( $N_{\text{loci}}$ ), their effect sizes, and the degree of LD among them (when applicable), whereby continuous dashed lines indicate negligible levels of LD and continuous solid lines indicate strong LD. Individual black lines represent hypothetical replicate simulations ( $N=3$ ).
